# Supplementary material for: Mechanistic Insights into the Curcumin-Mediated Neuroprotection in Alzheimer&rsquo;s Disease: An Integrated System Pharmacology and Molecular Simulation Study
Source: Preprints.org preprint supplement (doi:10.20944/preprints202001.0109.v1), 2020-01-11
Supplement: Supplementary file 1 [file supplementary]

## Sheet: Curcumin-Target-AD association
Curcumin_Terget gene	AD_gene	Gene_id	UniProt	Gene_Full_Name
ABCB1	ABCB1	5243	P08183	ATP binding cassette subfamily B member 1
ABCG2	ABCG2	9429	Q9UNQ0	ATP binding cassette subfamily G member 2 (Junior blood group)
ACHE	ACHE	43	P22303	acetylcholinesterase (Cartwright blood group)
ADAM17	ADAM17	6868	P78536	ADAM metallopeptidase domain 17
AIF1	AIF1	199	P55008	allograft inflammatory factor 1
AKT1	AKT1	207	P31749	AKT serine/threonine kinase 1
ANXA1	ANXA1	301	P04083	annexin A1
APBA2	APBA2	321	Q99767	amyloid beta precursor protein binding family A member 2
APLP1	APLP1	333	P51693	amyloid beta precursor like protein 1
APLP2	APLP2	334	Q06481	amyloid beta precursor like protein 2
APOA1	APOA1	335	P02647	apolipoprotein A1
APOE	APOE	348	P02649	apolipoprotein E
APP	APP	351	P05067	amyloid beta precursor protein
ATM	ATM	472	Q13315	ATM serine/threonine kinase
BACE1	BACE1	23621	P56817	beta-secretase 1
BAX	BAX	581	Q07812	BCL2 associated X, apoptosis regulator
BCL2	BCL2	596	P10415	BCL2, apoptosis regulator
BCL2L11	BCL2L11	10018	O43521	BCL2 like 11
BDNF	BDNF	627	P23560	brain derived neurotrophic factor
BID	BID	637	P55957	BH3 interacting domain death agonist
CALM2	CALM2	805	P0DP23;P0DP24;P0DP25	calmodulin 2
CALM3	CALM3	808	P0DP23;P0DP24;P0DP25	calmodulin 3
CAMK2A	CAMK2A	815	Q9UQM7	calcium/calmodulin dependent protein kinase II alpha
CASP12	CASP12	100506742	Q6UXS9	caspase 12 (gene/pseudogene)
CASP3	CASP3	836	P42574	caspase 3
CASP7	CASP7	840	P55210	caspase 7
CASP8	CASP8	841	Q14790	caspase 8
CASP9	CASP9	842	P55211	caspase 9
CAT	CAT	847	P04040	catalase
CAV1	CAV1	857	Q03135	caveolin 1
CCL2	CCL2	6347	P13500	C-C motif chemokine ligand 2
CCL3	CCL3	6348	P10147	C-C motif chemokine ligand 3
CCL5	CCL5	6352	P13501	C-C motif chemokine ligand 5
CCND1	CCND1	595	P24385	cyclin D1
CCR2	CCR2	729230	P41597	C-C motif chemokine receptor 2
CCR5	CCR5	1234	P51681	C-C motif chemokine receptor 5 (gene/pseudogene)
CD33	CD33	945	P20138	CD33 molecule
CD44	CD44	960	P16070	CD44 molecule (Indian blood group)
CD68	CD68	968	P34810	CD68 molecule
CD69	CD69	969	Q07108	CD69 molecule
CDC42	CDC42	998	P60953	cell division cycle 42
CDH1	CDH1	999	P12830	cadherin 1
CDK4	CDK4	1019	P11802	cyclin dependent kinase 4
CDK5	CDK5	1020	Q00535	cyclin dependent kinase 5
CDK5R1	CDK5R1	8851	Q15078	cyclin dependent kinase 5 regulatory subunit 1
CDKN1A	CDKN1A	1026	P38936	cyclin dependent kinase inhibitor 1A
CLCN3	CLCN3	1182	P51790	chloride voltage-gated channel 3
CNTF	CNTF	1270	P26441	ciliary neurotrophic factor
COL11A2	COL11A2	1302	P13942	collagen type XI alpha 2 chain
CREBBP	CREBBP	1387	Q92793	CREB binding protein
CRMP1	CRMP1	1400	Q14194	collapsin response mediator protein 1
CTNNB1	CTNNB1	1499	P35222	catenin beta 1
CXCL12	CXCL12	6387	P48061	C-X-C motif chemokine ligand 12
CXCR4	CXCR4	7852	P61073	C-X-C motif chemokine receptor 4
CYP2C19	CYP2C19	1557	P33261	cytochrome P450 family 2 subfamily C member 19
CYP3A4	CYP3A4	1576	P08684	cytochrome P450 family 3 subfamily A member 4
DCX	DCX	1641	O43602	doublecortin
DNM1L	DNM1L	10059	O00429	dynamin 1 like
DPYSL2	DPYSL2	1808	Q16555	dihydropyrimidinase like 2
E2F1	E2F1	1869	Q01094	E2F transcription factor 1
EGF	EGF	1950	P01133	epidermal growth factor
EGFR	EGFR	1956	P00533	epidermal growth factor receptor
EGR1	EGR1	1958	P18146	early growth response 1
EHMT1	EHMT1	79813	Q9H9B1	euchromatic histone lysine methyltransferase 1
EIF2AK3	EIF2AK3	9451	Q9NZJ5	eukaryotic translation initiation factor 2 alpha kinase 3
EIF4E	EIF4E	1977	P06730	eukaryotic translation initiation factor 4E
ENO2	ENO2	2026	P09104	enolase 2
EP300	EP300	2033	Q09472	E1A binding protein p300
ERBB2	ERBB2	2064	P04626	erb-b2 receptor tyrosine kinase 2
ESR1	ESR1	2099	P03372	estrogen receptor 1
ESR2	ESR2	2100	Q92731	estrogen receptor 2
FAS	FAS	355	P25445	Fas cell surface death receptor
FGFR3	FGFR3	2261	P22607	fibroblast growth factor receptor 3
FIS1	FIS1	51024	Q9Y3D6	fission, mitochondrial 1
FOS	FOS	2353	P01100	Fos proto-oncogene, AP-1 transcription factor subunit
FOXM1	FOXM1	2305	Q08050	forkhead box M1
GDNF	GDNF	2668	P39905	glial cell derived neurotrophic factor
GFAP	GFAP	2670	P14136	glial fibrillary acidic protein
GRIN1	GRIN1	2902	Q05586	glutamate ionotropic receptor NMDA type subunit 1
GRIN2A	GRIN2A	2903	Q12879	glutamate ionotropic receptor NMDA type subunit 2A
GRIN2B	GRIN2B	2904	Q13224	glutamate ionotropic receptor NMDA type subunit 2B
GSK3B	GSK3B	2932	P49841	glycogen synthase kinase 3 beta
GSR	GSR	2936	P00390	glutathione-disulfide reductase
GSTM1	GSTM1	2944	P09488	glutathione S-transferase mu 1
HDAC1	HDAC1	3065	Q13547	histone deacetylase 1
HDAC3	HDAC3	8841	O15379	histone deacetylase 3
HDAC6	HDAC6	10013	Q9UBN7	histone deacetylase 6
HDAC9	HDAC9	9734	Q9UKV0	histone deacetylase 9
HIF1A	HIF1A	3091	Q16665	hypoxia inducible factor 1 subunit alpha
HK1	HK1	3098	P19367	hexokinase 1
HMGB1	HMGB1	3146	P09429	high mobility group box 1
HMOX1	HMOX1	3162	P09601	heme oxygenase 1
HSPA1A	HSPA1A	3303	P0DMV8;P0DMV9	heat shock protein family A (Hsp70) member 1A
HSPA1B	HSPA1B	3304	P0DMV8;P0DMV9	heat shock protein family A (Hsp70) member 1B
HSPA4	HSPA4	3308	P34932	heat shock protein family A (Hsp70) member 4
HSPA5	HSPA5	3309	P11021	heat shock protein family A (Hsp70) member 5
HSPA8	HSPA8	3312	P11142	heat shock protein family A (Hsp70) member 8
HSPB1	HSPB1	3315	P04792	heat shock protein family B (small) member 1
HSPH1	HSPH1	10808	Q92598	heat shock protein family H (Hsp110) member 1
HTT	HTT	3064	P42858	huntingtin
ICAM1	ICAM1	3383	P05362	intercellular adhesion molecule 1
IFNB1	IFNB1	3456	P01574	interferon beta 1
IFNG	IFNG	3458	P01579	interferon gamma
IGF1	IGF1	3479	P05019	insulin like growth factor 1
IGF1R	IGF1R	3480	P08069	insulin like growth factor 1 receptor
IL13	IL13	3596	P35225	interleukin 13
IL1B	IL1B	3553	P01584	interleukin 1 beta
IL6	IL6	3569	P05231	interleukin 6
INSR	INSR	3643	P06213	insulin receptor
IRF6	IRF6	3664	O14896	interferon regulatory factor 6
IRS1	IRS1	3667	P35568	insulin receptor substrate 1
IRS2	IRS2	8660	Q9Y4H2	insulin receptor substrate 2
ITGAM	ITGAM	3684	P11215	integrin subunit alpha M
JUN	JUN	3725	P05412	Jun proto-oncogene, AP-1 transcription factor subunit
KEAP1	KEAP1	9817	Q14145	kelch like ECH associated protein 1
LRRK2	LRRK2	120892	Q5S007	leucine rich repeat kinase 2
MAOA	MAOA	4128	P21397	monoamine oxidase A
MAOB	MAOB	4129	P27338	monoamine oxidase B
MAP1LC3A	MAP1LC3A	84557	Q9H492	microtubule associated protein 1 light chain 3 alpha
MAP2	MAP2	4133	P11137	microtubule associated protein 2
MAP2K2	MAP2K2	5605	P36507	mitogen-activated protein kinase kinase 2
MAP2K4	MAP2K4	6416	P45985	mitogen-activated protein kinase kinase 4
MAPK1	MAPK1	5594	P28482	mitogen-activated protein kinase 1
MAPK14	MAPK14	1432	Q16539	mitogen-activated protein kinase 14
MAPK3	MAPK3	5595	P27361	mitogen-activated protein kinase 3
MAPK8	MAPK8	5599	P45983	mitogen-activated protein kinase 8
MAPT	MAPT	4137	P10636	microtubule associated protein tau
MDM2	MDM2	4193	Q00987	MDM2 proto-oncogene
MFN2	MFN2	9927	O95140	mitofusin 2
MGAT3	MGAT3	4248	Q09327	mannosyl (beta-1,4-)-glycoprotein beta-1,4-N-acetylglucosaminyltransferase
MME	MME	4311	P08473	membrane metalloendopeptidase
MMP1	MMP1	4312	P03956	matrix metallopeptidase 1
MMP2	MMP2	4313	P08253	matrix metallopeptidase 2
MMP9	MMP9	4318	P14780	matrix metallopeptidase 9
MTOR	MTOR	2475	P42345	mechanistic target of rapamycin kinase
MYC	MYC	4609	P01106	MYC proto-oncogene, bHLH transcription factor
NEFH	NEFH	4744	P12036	neurofilament heavy
NES	NES	10763	P48681	nestin
NFE2L2	NFE2L2	4780	Q16236	nuclear factor, erythroid 2 like 2
NFKB1	NFKB1	4790	P19838	nuclear factor kappa B subunit 1
NGF	NGF	4803	P01138	nerve growth factor
NGFR	NGFR	4804	P08138	nerve growth factor receptor
NLGN1	NLGN1	22871	Q8N2Q7	neuroligin 1
NOS1	NOS1	4842	P29475	nitric oxide synthase 1
NOS2	NOS2	4843	P35228	nitric oxide synthase 2
NOS3	NOS3	4846	P29474	nitric oxide synthase 3
NOTCH1	NOTCH1	4851	P46531	notch 1
NPC1	NPC1	4864	O15118	NPC intracellular cholesterol transporter 1
NPC2	NPC2	10577	P61916	NPC intracellular cholesterol transporter 2
NPPA	NPPA	4878	P01160	natriuretic peptide A
NQO1	NQO1	1728	P15559	NAD(P)H quinone dehydrogenase 1
NR1H2	NR1H2	7376	P55055	nuclear receptor subfamily 1 group H member 2
NR1H3	NR1H3	10062	Q13133	nuclear receptor subfamily 1 group H member 3
NR3C1	NR3C1	2908	P04150	nuclear receptor subfamily 3 group C member 1
NRG1	NRG1	3084	Q02297	neuregulin 1
NTRK1	NTRK1	4914	P04629	neurotrophic receptor tyrosine kinase 1
NTRK2	NTRK2	4915	Q16620	neurotrophic receptor tyrosine kinase 2
OLR1	OLR1	4973	P78380	oxidized low density lipoprotein receptor 1
PAK1	PAK1	5058	Q13153	p21 (RAC1) activated kinase 1
PARP1	PARP1	142	P09874	poly(ADP-ribose) polymerase 1
PAX6	PAX6	5080	P26367	paired box 6
PDE4A	PDE4A	5141	P27815	phosphodiesterase 4A
PDK1	PDK1	5163	Q15118	pyruvate dehydrogenase kinase 1
PIK3CA	PIK3CA	5290	P42336	phosphatidylinositol-4,5-bisphosphate 3-kinase catalytic subunit alpha
PIK3CG	PIK3CG	5294	P48736	phosphatidylinositol-4,5-bisphosphate 3-kinase catalytic subunit gamma
PINK1	PINK1	65018	Q9BXM7	PTEN induced putative kinase 1
PRDX6	PRDX6	9588	P30041	peroxiredoxin 6
PRKAA1	PRKAA1	5562	Q13131	protein kinase AMP-activated catalytic subunit alpha 1
PRKAA2	PRKAA2	5563	P54646	protein kinase AMP-activated catalytic subunit alpha 2
PRRT2	PRRT2	112476	Q7Z6L0	proline rich transmembrane protein 2
PSEN1	PSEN1	5663	P49768	presenilin 1
PSEN2	PSEN2	5664	P49810	presenilin 2
PTEN	PTEN	5728	P60484	phosphatase and tensin homolog
PTGER2	PTGER2	5732	P43116	prostaglandin E receptor 2
PTGES	PTGES	9536	O14684	prostaglandin E synthase
PTGS2	PTGS2	5743	P35354	prostaglandin-endoperoxide synthase 2
RAC1	RAC1	5879	P63000	Rac family small GTPase 1
RELA	RELA	5970	Q04206	RELA proto-oncogene, NF-kB subunit
RELN	RELN	5649	P78509	reelin
RXRA	RXRA	6256	P19793	retinoid X receptor alpha
SHANK1	SHANK1	50944	Q9Y566	SH3 and multiple ankyrin repeat domains 1
SIRT1	SIRT1	23411	Q96EB6	sirtuin 1
SLC16A7	SLC16A7	9194	O60669	solute carrier family 16 member 7
SLC18A2	SLC18A2	6571	Q05940	solute carrier family 18 member A2
SLC2A1	SLC2A1	6513	P11166	solute carrier family 2 member 1
SLC2A3	SLC2A3	6515	P11169	solute carrier family 2 member 3
SLC2A4	SLC2A4	6517	P14672	solute carrier family 2 member 4
SLC6A3	SLC6A3	6531	Q01959	solute carrier family 6 member 3
SLC8A1	SLC8A1	6546	P32418	solute carrier family 8 member A1
SLC8A3	SLC8A3	6547	P57103	solute carrier family 8 member A3
SMAD2	SMAD2	4087	Q15796	SMAD family member 2
SNCA	SNCA	6622	P37840	synuclein alpha
SOD2	SOD2	6648	P04179	superoxide dismutase 2
SOX2	SOX2	6657	P48431	SRY-box 2
SREBF2	SREBF2	6721	Q12772	sterol regulatory element binding transcription factor 2
STAT1	STAT1	6772	P42224	signal transducer and activator of transcription 1
STAT3	STAT3	6774	P40763	signal transducer and activator of transcription 3
SUMO1	SUMO1	7341	P63165	small ubiquitin-like modifier 1
SYN1	SYN1	6853	P17600	synapsin I
SYP	SYP	6855	P08247	synaptophysin
TARDBP	TARDBP	23435	Q13148	TAR DNA binding protein
TERT	TERT	7015	O14746	telomerase reverse transcriptase
TFAM	TFAM	7019	Q00059	transcription factor A, mitochondrial
TGFB1	TGFB1	7040	P01137	transforming growth factor beta 1
TGFB2	TGFB2	7042	P61812	transforming growth factor beta 2
TLR2	TLR2	7097	O60603	toll like receptor 2
TLR4	TLR4	7099	O00206	toll like receptor 4
TLR9	TLR9	54106	Q9NR96	toll like receptor 9
TNF	TNF	7124	P01375	tumor necrosis factor
TNFSF10	TNFSF10	8743	P50591	TNF superfamily member 10
TP53	TP53	7157	P04637	tumor protein p53
TPI1	TPI1	7167	P60174	triosephosphate isomerase 1
TREM1	TREM1	54210	Q9NP99	triggering receptor expressed on myeloid cells 1
TREM2	TREM2	54209	Q9NZC2	triggering receptor expressed on myeloid cells 2
TYROBP	TYROBP	7305	O43914	TYRO protein tyrosine kinase binding protein
VCAM1	VCAM1	7412	P19320	vascular cell adhesion molecule 1
VDAC1	VDAC1	7416	P21796	voltage dependent anion channel 1
VEGFA	VEGFA	7422	P15692	vascular endothelial growth factor A
VIM	VIM	7431	P08670	vimentin
XIAP	XIAP	331	P98170	X-linked inhibitor of apoptosis
ATF1	IL13	3596	P35225	interleukin 13
BAD	IL6	3569	P05231	interleukin 6
BCL2L1
EIF2A
IL10RA
LFA1
MAPK11
MFN1
NEUROD1
NEUROG1
NFE2L1
NR1C1
NR1C3
OPA1
PGC1A
PIK3R1
PSD95
WNT10B
