# Supplementary material for: Mechanistic Insights into the Curcumin-Mediated Neuroprotection in Alzheimer&rsquo;s Disease: An Integrated System Pharmacology and Molecular Simulation Study
Source: Preprints.org preprint supplement (doi:10.20944/preprints202001.0109.v1), 2020-01-11
Supplement: Supplementary file 2 [file TableS1_ADMET-properties-of-curcumin.xlsx]

## Sheet: Table S1. Pharmacokinetics
		Lipinski’s rule of five				Jorgensen’s rule of three			Blood Brain Barrier Permeability
molecule	#stars	mol_MW	donorHB	accptHB	QPlogPo/w	QPlogS	QPPCaco	#metabolites	QPlogBB		PercentHumanOralAbsorption	Rule Of Five (violation)	Rule Of Three (violation)
Curcumin	0	368.385	2	7	2.735	-4.503	151.758	5	−2.256		82	0	0
	QikProp properties and descriptors.
	Property or Descriptor	Description	Range or recommended values
Overall score	#stars	number of property or descriptor values that fall outside the 95% range of similar values for known drugs	0 – 5
Lipinski’s rule of five	mol_MW	Molecular weight of the molecule.	130.0 − 725.0
	donorHB	Estimated number of hydrogen bonds that would be donated by the solute to water molecules in an aqueous solution. Values are averages taken over a number of configurations, so they can be non-integer.	0.0 – 6.0
	accptHB	Estimated number of hydrogen bonds that would be accepted by the solute from water molecules in an aqueous solution. Values are averages taken over a number of configurations, so they can be non-integer.	2.0 – 20.0
	QPlogPo/w	Predicted octanol/water partition coefficient.	–2.0 – 6.5
Jorgensen’s rule of three	QPlogS	Predicted aqueous solubility, log S. S in mol dm–3 is the concentration of the solute in a saturated solution that is in equilibrium with the crystalline solid.	–6.5 – 0.5
	QPPCaco	Predicted apparent Caco-2 cell permeability in nm/sec. Caco2 cells are a model for the gut-blood barrier. QikProp predictions are for non-active transport.	500 great
	#metabolites	Number of likely metabolic reactions.	1 – 8
BBB	QPlogBB	Predicted brain/blood partition coefficient. Note: QikProp predictions are for orally delivered drugs so, for example, dopamine and serotonin are CNS negative because they are too polar to cross the blood-brain barrier	–3.0 – 1.2
	PercentHumanOralAbsorption	Predicted human oral absorption on 0 to 100% scale. The prediction is based on a quantitative multiple linear regression model. This property usually correlates well with HumanOralAbsorption, as both measure the same property.	>80% is high
	RuleOfFive	Number of violations of Lipinski’s rule of five [3]. The rules are: mol_MW < 500, QPlogPo/w < 5, donorHB ≤ 5, accptHB ≤ 10. Compounds that satisfy these rules are considered druglike. (The “five” refers to the limits, which are multiples of 5.)	maximum is 4
	RuleOfThree	Number of violations of Jorgensen’s rule of three. The three rules are: QPlogS > -5.7, QP PCaco > 22 nm/s, # Primary Metabolites < 7. Compounds with fewer (and preferably no) violations of these rules are more likely to be orally available.	maximum is 3
