# Supplementary material for: Mechanistic Insights into the Curcumin-Mediated Neuroprotection in Alzheimer&rsquo;s Disease: An Integrated System Pharmacology and Molecular Simulation Study
Source: Preprints.org preprint supplement (doi:10.20944/preprints202001.0109.v1), 2020-01-11
Supplement: Supplementary file 6 [file TableS3_Binding energy.xlsx]

## Sheet: Binding-energy
PDB ID	Curcumin target	glide emodel	glide energy	glide ligand efficiency	glide ecoul	docking score	MMGBSA dG Bind
1HCF	TrkB	-43.753	-36.757	-0.138	-9.024	-3.716	-43.931
1P8D	LXR-β	-74.477	-50.493	-0.424	-0.874	-11.454	-60.14
5EWM	GluN2B	-42.209	-34.418	-0.173	-4.147	-4.68	-52.009
5GPG	mTOR	-67.941	-46.174	-0.3	-3.424	-8.1	-62.066
4EY7	AChE	-86.345	-57.892	-0.395	-10.018	-10.672	-55.089
6NIG	TLR2	-61.163	-44.148	-0.342	-1.296	-9.24	-50.529
5HDZ	BACE-1	-58.991	-44.306	-0.241	-11.319	-6.508	-39.844
4AFJ	GSK-3β	-63.552	-46.91	-0.321	-12.404	-8.667	-54.651
1QKM	ER-β	-47.545	-35.903	-0.208	-6.197	-5.608	-46.079
